# Supplementary material for: Modulations in the offspring gut microbiome are refractory to postnatal synbiotic supplementation among juvenile primates
Source: PubMed Central journal article supplement (PMC5887201; doi:10.1186/s12866-018-1169-9), 2018-04-05
Supplement: 12866_2018_1169_MOESM2_ESM.pdf [file 12866_2018_1169_MOESM2_ESM.pdf]

|                                                        |                | Untreated, 15 months (anus & stool) | Untreated & HFD Challenge, 26 months (anus) | Pre-supplementation (anus) | Mid-supplementation (stool) | 1-month post-supplementation (stool) | 2-month post-supplementation (anus & stool) | 4-months post-supplementation (stool) | HFD Challenge (stool) |
|--------------------------------------------------------|----------------|-------------------------------------|---------------------------------------------|----------------------------|-----------------------------|--------------------------------------|---------------------------------------------|---------------------------------------|-----------------------|
| <b>Juveniles (n)</b>                                   |                | 3                                   | 4                                           | 7                          | 7                           | 7                                    | 7                                           | 7                                     | 7                     |
| <b>Male (n)</b>                                        |                | 2                                   | -                                           | 5                          | 5                           | 5                                    | 5                                           | 5                                     | 5                     |
| <b>Female (n)</b>                                      |                | 1                                   | 4                                           | 2                          | 2                           | 2                                    | 2                                           | 2                                     | 2                     |
| <b>Total samples (n)</b>                               |                | 6                                   | 4                                           | 7                          | 7                           | 7                                    | 14                                          | 7                                     | 7                     |
| <b>Samples male (n)</b>                                |                | 4                                   | -                                           | 5                          | 5                           | 5                                    | 10                                          | 5                                     | 5                     |
| <b>Samples female (n)</b>                              |                | 2                                   | 4                                           | 2                          | 2                           | 2                                    | 4                                           | 2                                     | 2                     |
| <b>Age at sampling (months)</b>                        |                | 15                                  | 25-27                                       | 17-20                      | 19-22                       | 21-24                                | 22-25                                       | 24-27                                 | 26-28                 |
| <b>Read counts (Pre-filtered)</b>                      | <b>Minimum</b> | 15039                               | 7717                                        | 3634                       | 3932                        | 3621                                 | 3835                                        | 3951                                  | 5242                  |
|                                                        | <b>Median</b>  | 22994                               | 8845                                        | 5147                       | 4986                        | 5126                                 | 4481                                        | 4804                                  | 6474                  |
|                                                        | <b>Max</b>     | 30355                               | 9846                                        | 6569                       | 5762                        | 5909                                 | 6780                                        | 7210                                  | 7777                  |
|                                                        | <b>Mean</b>    | 22508                               | 8813                                        | 4989                       | 4907                        | 4839                                 | 4793                                        | 4941                                  | 6540                  |
|                                                        | <b>SD</b>      | 5610                                | 902                                         | 924                        | 673                         | 900                                  | 857                                         | 1074                                  | 945                   |
| <b>Read counts (post-closed referecne OTU picking)</b> | <b>Minimum</b> | 8700                                | 4314                                        | 3269                       | 3371                        | 3135                                 | 2969                                        | 3207                                  | 4697                  |
|                                                        | <b>Median</b>  | 12335                               | 6797                                        | 4366                       | 4279                        | 4324                                 | 3889                                        | 4017                                  | 5211                  |
|                                                        | <b>Max</b>     | 17281                               | 7498                                        | 5841                       | 5376                        | 4998                                 | 5932                                        | 6404                                  | 6581                  |
|                                                        | <b>Mean</b>    | 12630                               | 6351.5                                      | 4367                       | 4176                        | 4176                                 | 4090                                        | 4299                                  | 5557                  |
|                                                        | <b>SD</b>      | 2899                                | 1453                                        | 842                        | 791                         | 783                                  | 861                                         | 1024                                  | 727                   |
