# Supplementary material for: Modulations in the offspring gut microbiome are refractory to postnatal synbiotic supplementation among juvenile primates
Source: PubMed Central journal article supplement (PMC5887201; doi:10.1186/s12866-018-1169-9), 2018-04-05
Supplement: 12866_2018_1169_MOESM3_ESM.pdf [file 12866_2018_1169_MOESM3_ESM.pdf]

| Primer              | Specificity                      | Sequence                           | Annealing Temperature | Reference                                                                     |
|---------------------|----------------------------------|------------------------------------|-----------------------|-------------------------------------------------------------------------------|
| Lplant_For          | <i>Lactobacillus plantarum</i>   | TTA ATT TTC CGC GCA ACA AGT        | 57.5°C                | Perez-Diaz <i>et al</i> 2013                                                  |
| Lplant_Rev          | <i>Lactobacillus plantarum</i>   | CTA AAA GCG AAG TAT GGC GTC AAA    | 57.5°C                | Perez-Diaz <i>et al</i> 2013                                                  |
| LacidF1             | <i>Lactobacillus acidophilus</i> | GAC TGA ATA CGA TTA CCC TGG TGAT   | 50.3 °C               | Current study                                                                 |
| LacidR1             | <i>Lactobacillus acidophilus</i> | CTT ATG AGT TTG GAT TGA GCC G      | 50.3 °C               | Current study                                                                 |
| EM1A                | <i>Enterococcus faecium</i>      | TTG AGG CAG ACC AGA TTG ACG        | 57°C                  | Cheng <i>et al</i> 1997                                                       |
| EM1B                | <i>Enterococcus faecium</i>      | TAT GAC AGC GAC TCC GAT TCC        | 57°C                  | Cheng <i>et al</i> 1997                                                       |
| LcaseiF10           | <i>Lactobacillus casei</i>       | ACT GAT CGT GCC AAG GGT G          | 54°C                  | Current study                                                                 |
| LcaseiR10           | <i>Lactobacillus casei</i>       | TAG GCT TCA ACA CCT GGC TG         | 54°C                  | Current study                                                                 |
| LactoF1             | <i>Lactobaccillus</i> genus      | GCA TGG GTA GCG AAC AGG            | 54°C                  | Current study                                                                 |
| LactoR1             | <i>Lactobaccillus</i> genus      | CAC CTT CCT CCG GTT TGT CA         | 54°C                  | Current study                                                                 |
| F_alllact_IS        | <i>Lactobacillus</i>             | TGG ATG CCT TGG CAC TAG GA         | 53°C                  | Haarman and Knol 2006                                                         |
| R_alllact_IS        | <i>Lactobacillus</i>             | AAA TCT CCG GAT CAA AGC TTA CTT AT | 53°C                  | Haarman and Knol 2006                                                         |
| 16S-Universal-334-F | 16S Universal                    | TCC TAC GGG AGG CAG CAC T          | 60°C                  | Nadkarni <i>et al</i> 2002, Mohammadi <i>et al</i> 2003, Ma <i>et al</i> 2014 |
| 16S-Universal-800-R | 16S Universal                    | GGA CTA CCA GGG TAT CTA ATC CTG TT | 60°C                  | Nadkarni <i>et al</i> 2002, Mohammadi <i>et al</i> 2003, Ma <i>et al</i> 2014 |
