# Supplementary material for: Modulations in the offspring gut microbiome are refractory to postnatal synbiotic supplementation among juvenile primates
Source: PubMed Central journal article supplement (PMC5887201; doi:10.1186/s12866-018-1169-9), 2018-04-05
Supplement: 12866_2018_1169_MOESM4_ESM.pdf [file 12866_2018_1169_MOESM4_ESM.pdf]

|                                                                   | <b>Unweighted UniFrac</b> | <b>Weighted UniFrac</b> |
|-------------------------------------------------------------------|---------------------------|-------------------------|
| <b>Sex</b>                                                        | 0.093                     | 0.328                   |
| <b>Age at sample (months)</b>                                     | 0.001                     | 0.094                   |
| <b>Sample group</b>                                               | 0.001                     | 0.046                   |
| <b>Received synbiotics (untreated vs. synbiotic supplemented)</b> | 0.001                     | 0.005                   |
