# Supplementary material for: Modulations in the offspring gut microbiome are refractory to postnatal synbiotic supplementation among juvenile primates
Source: PubMed Central journal article supplement (PMC5887201; doi:10.1186/s12866-018-1169-9), 2018-04-05

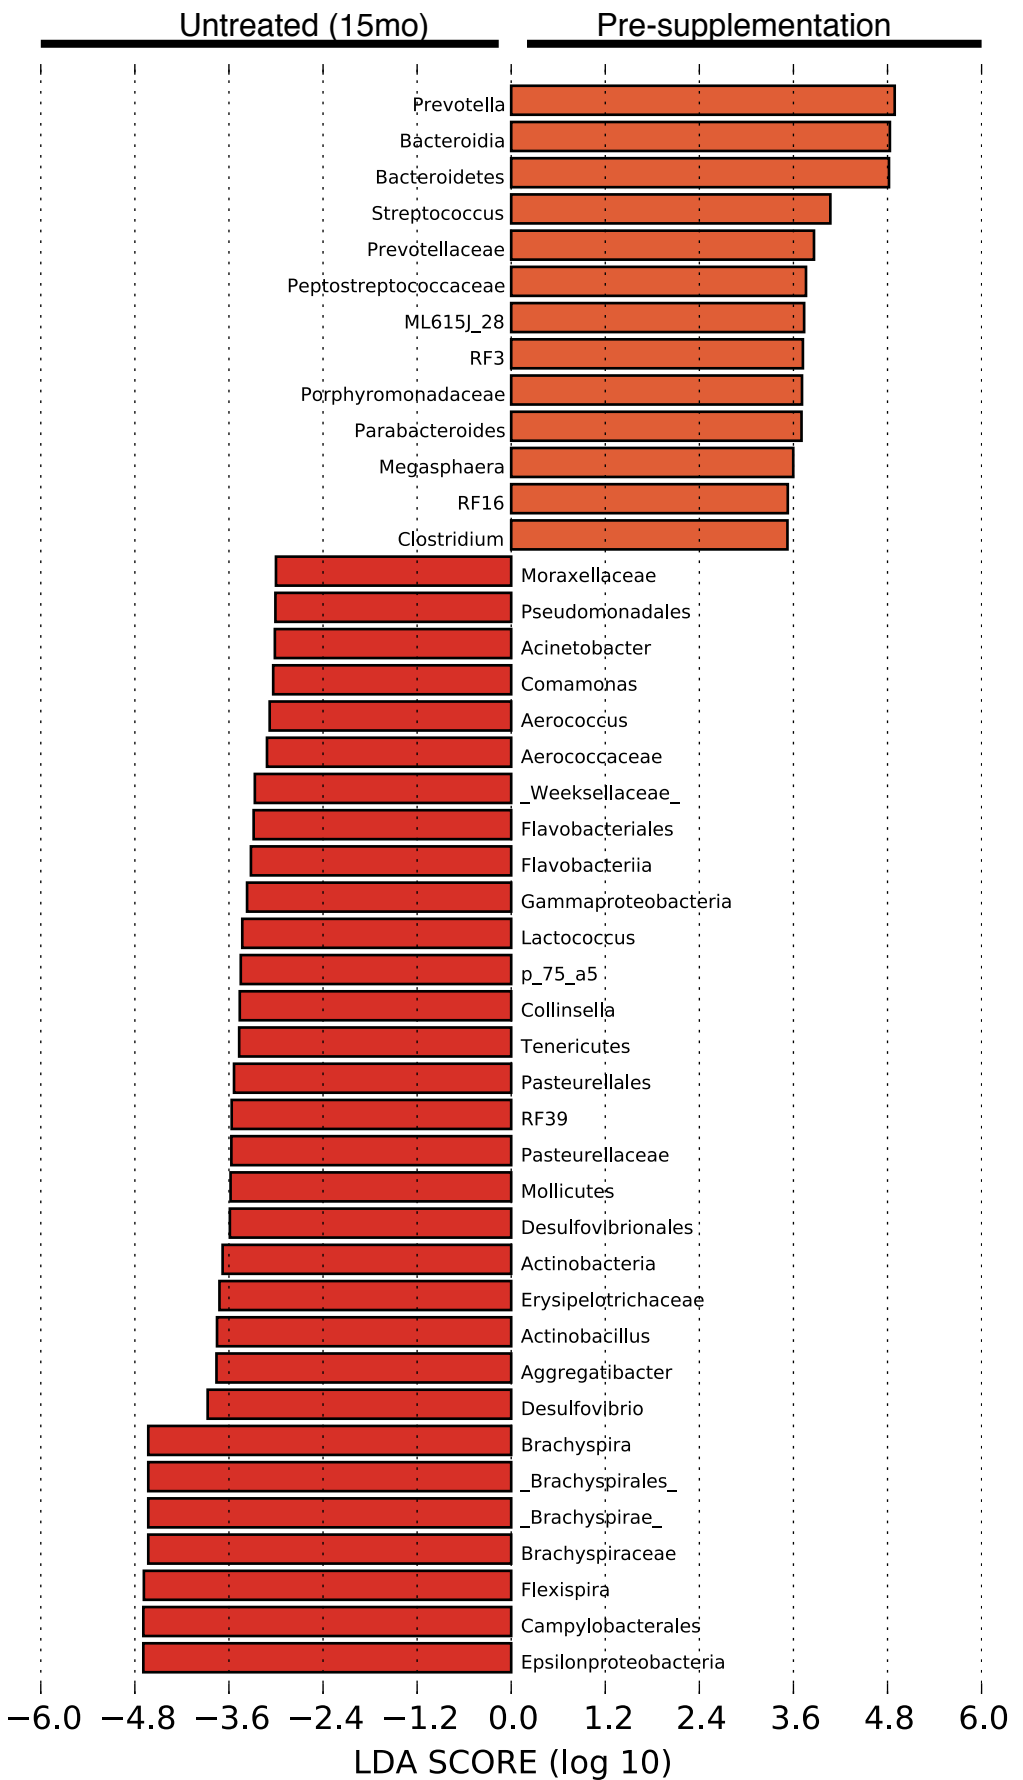

Supplement: 12866_2018_1169_MOESM5_ESM.pdf [file 12866_2018_1169_MOESM5_ESM.pdf]
