# Supplementary material for: Modulations in the offspring gut microbiome are refractory to postnatal synbiotic supplementation among juvenile primates
Source: PubMed Central journal article supplement (PMC5887201; doi:10.1186/s12866-018-1169-9), 2018-04-05
Supplement: 12866_2018_1169_MOESM8_ESM.pdf [file 12866_2018_1169_MOESM8_ESM.pdf]

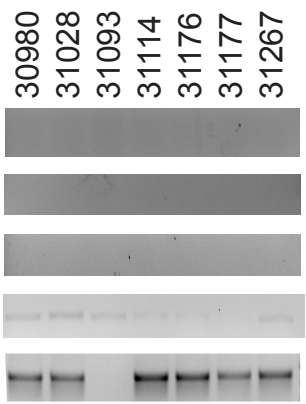

Pre-supplementation  
(Pre)

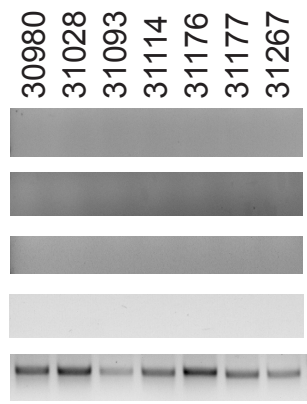

Mid-supplementation  
(Mid)

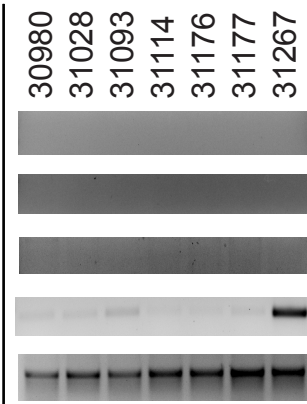

Post-supplementation  
(1mo, P1M)

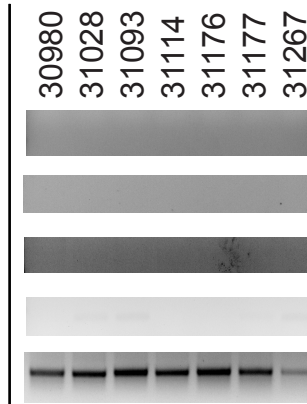

Post-supplementation  
(2mo, P2M)

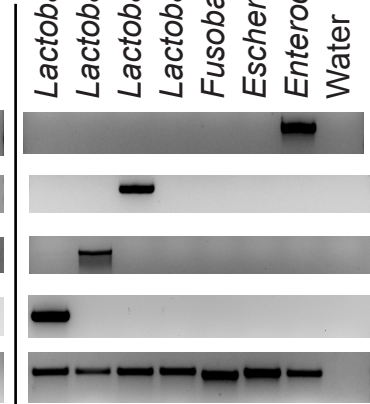

Controls

*Enterococcus faecium*  
*Lactobacillus plantarum*  
*Lactobacillus casei*  
*Lactobacillus acidophilus*  
16 Universal PCR
