# Supplementary material for: Modulations in the offspring gut microbiome are refractory to postnatal synbiotic supplementation among juvenile primates
Source: PubMed Central journal article supplement (PMC5887201; doi:10.1186/s12866-018-1169-9), 2018-04-05
Supplement: 12866_2018_1169_MOESM11_ESM.pdf [file 12866_2018_1169_MOESM11_ESM.pdf]

|                                        | <b>Unweighted<br/>UniFrac</b> | <b>Weighted<br/>UniFrac</b> |
|----------------------------------------|-------------------------------|-----------------------------|
| <b>Sex</b>                             | 0.559                         | 0.663                       |
| <b>Age at sample (months)</b>          | 0.056                         | 0.359                       |
| <b>Sample group</b>                    | 0.001                         | 0.024                       |
| <b>Prior synbiotic supplementation</b> | 0.001                         | 0.022                       |
| <b>HFD challenge</b>                   | 0.001                         | 0.066                       |
